# Supplementary material
Source: PubMed Central journal article supplement (PMC6420305)
Supplement: NIHMS1009691-supplement-Supplemental_files.pdf [file NIHMS1009691-supplement-Supplemental_files.pdf]

## Amino acid position (1-1464)

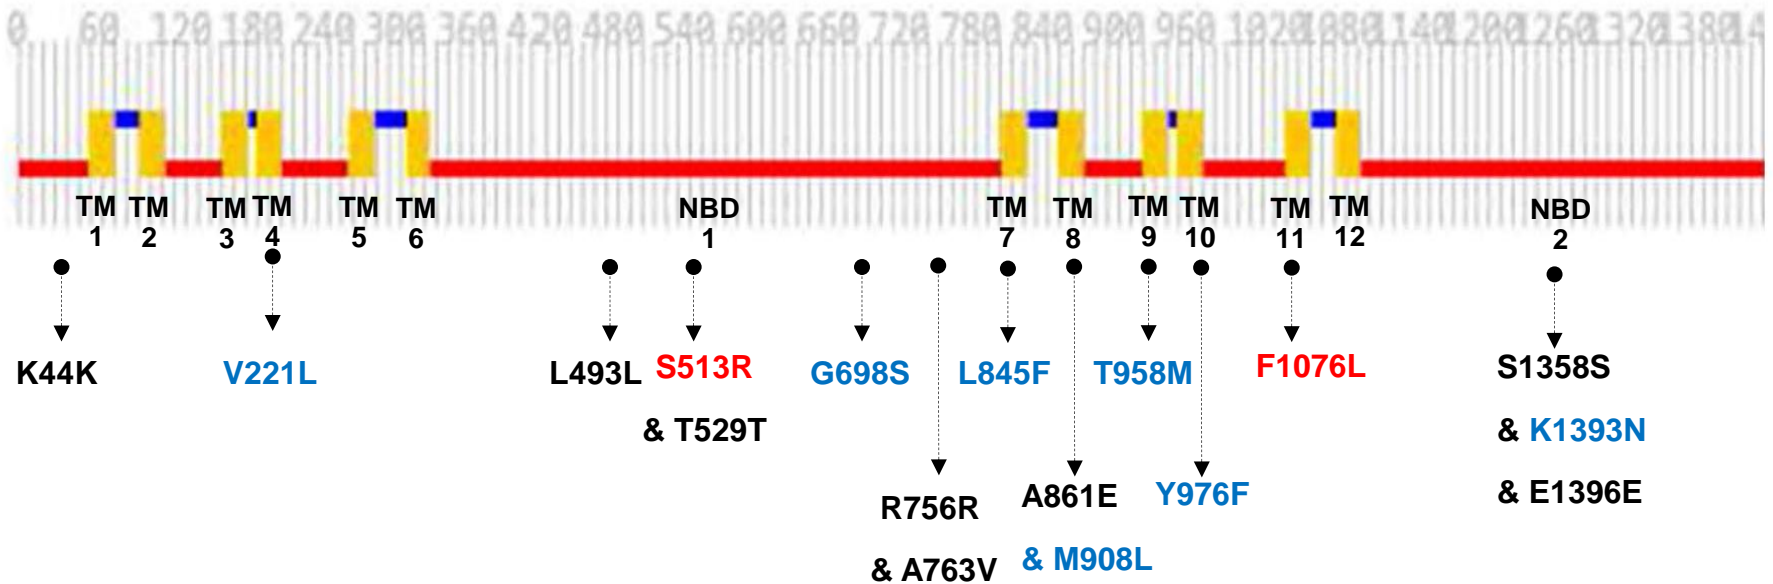

**Supplementary Fig. S1.** Predicted domain organization of Pvmdr1 and relative positions of the SNPs. Both synonymous and nonsynonymous SNPs with minor allele frequency of 5% were shown. Black SNPs were only found in Thai's samples but, blue SNPs were found both Thai and global samples. V221L and G698S were not found in Thai' samples. SNPs in red (S513R and F1076L) are the positions under positive selection. Orange bars indicate transmembrane (TM) domains. Red and blue bars indicate loops separating TM domains.

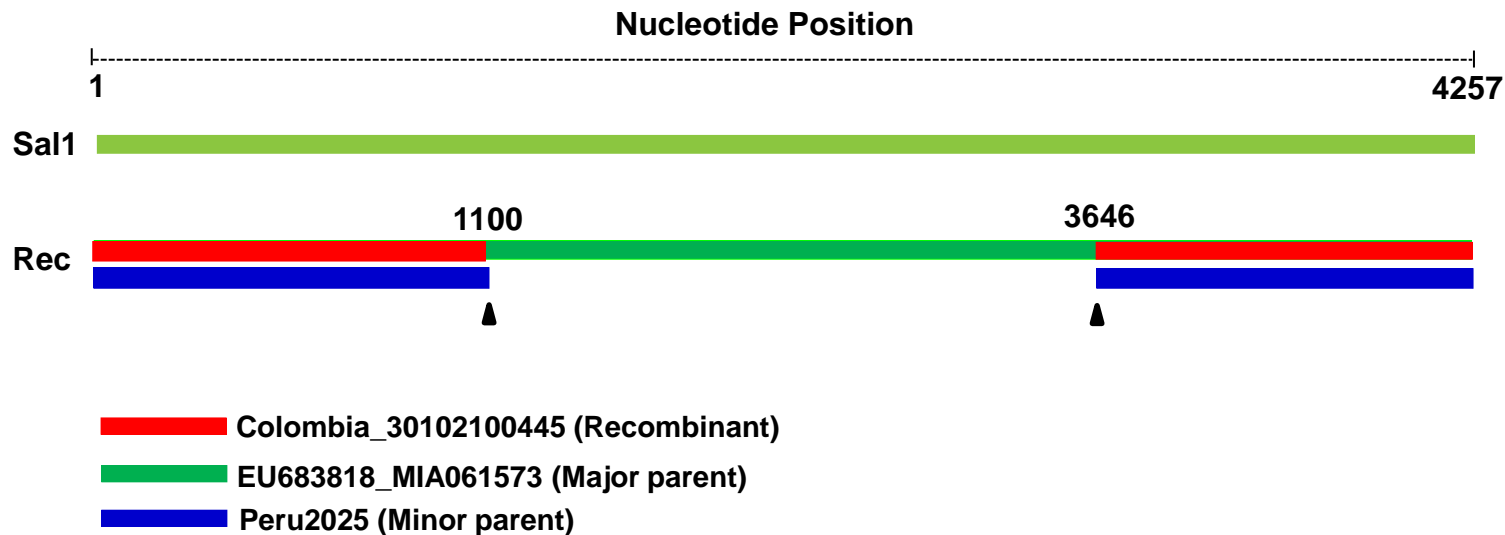

**Supplemental Fig. S2. Recombination event.** One significant recombination breakpoint ( $p < 0.05$ ) was detected by the MaxChi algorithm in RDP4 package (Rec). Green bar represents the major parent, blue bars the minor parent, and red bars the recombinant. The breakpoint positions (highlighted by the arrow heads) were compared to that of Sal I reference strain.

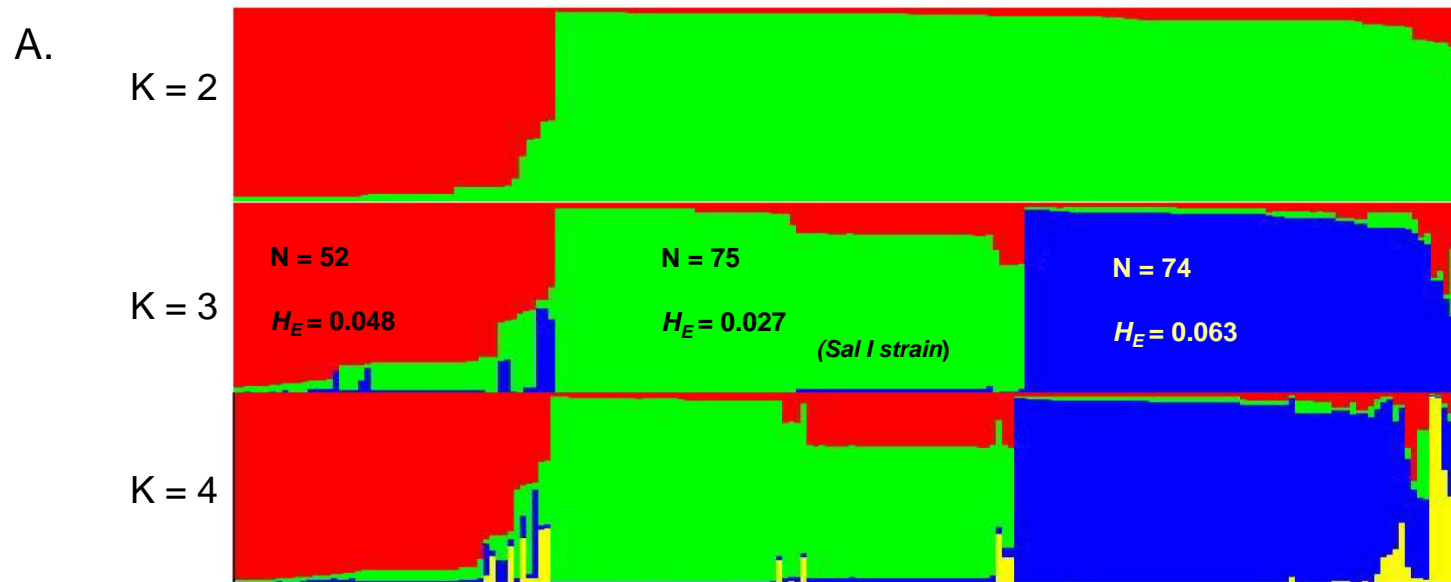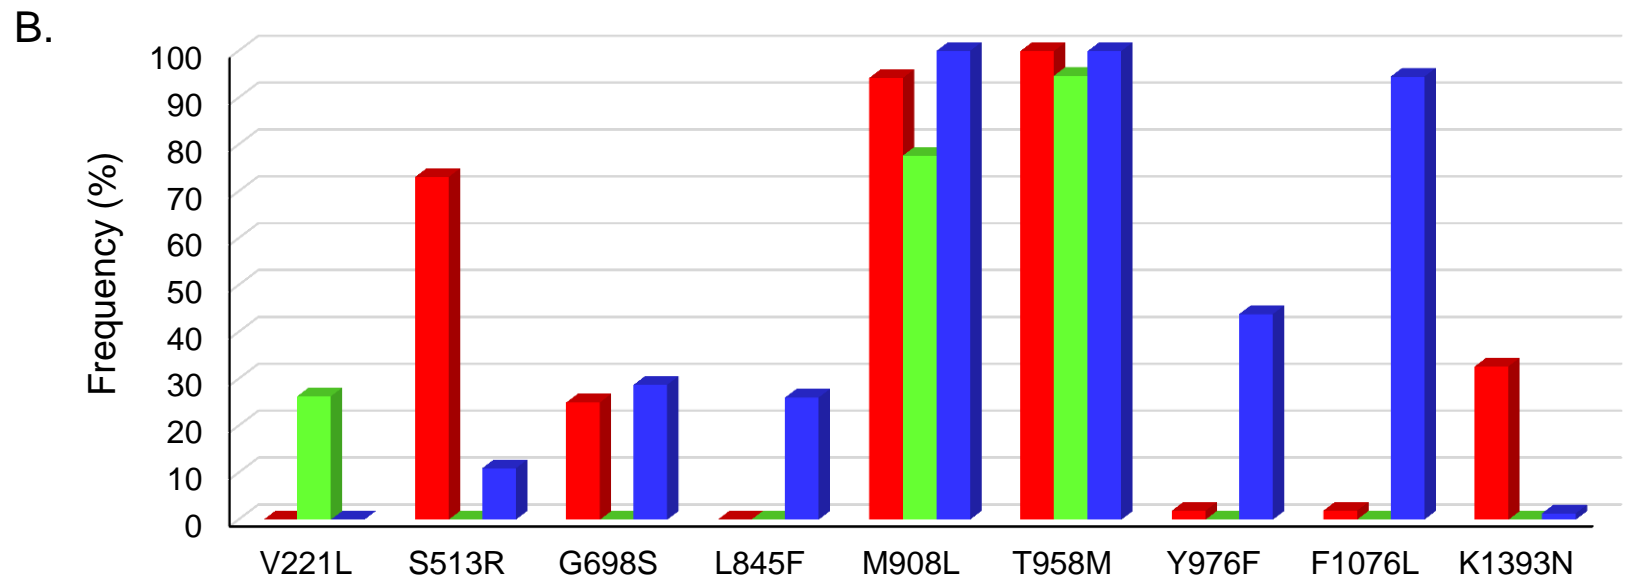

**Supplementary Fig. S3. (A)** Genetic structure of global *P. vivax* populations represented by different numbers of clusters. **(B)** The prevalence of each of the nine major SNPs in each cluster.

**Supplementary Table S1.** Primers used to amplify the near-complete *Pvm<sub>dr1</sub>* gene.

| <i>Primers</i> | <i>Sequence (5'→3')</i>  | <i>Position in whole gene</i> | <i>T<sub>m</sub></i> | <i>%GC</i> | <i>Application</i> |
|----------------|--------------------------|-------------------------------|----------------------|------------|--------------------|
| <b>MF1</b>     | ATGAAAAAGGATCAAAGGCAACCC | 1-24                          | 60.26                | 41.7       | PCR & Sequencing   |
| <b>MF2</b>     | GACTCACCTCTGCATCACG      | 593-612                       | 60.46                | 60.0       | Sequencing         |
| <b>MF3</b>     | GTTGTATGACCCACCGAGG      | 1299-1318                     | 60.11                | 60.0       | Sequencing         |
| <b>MF4</b>     | GATAAGCAGGAGAAGGGCGG     | 2044-2063                     | 60.25                | 60.0       | PCR & Sequencing   |
| <b>MF5</b>     | AGGATAGTCATGCCCCAGGA     | 2750-2769                     | 59.73                | 55.0       | Sequencing         |
| <b>MR5</b>     | TCCTGGGGCATGACTATCCT     | 3411-3422                     | 60.04                | 55.0       | PCR                |
| <b>MF6</b>     | AGTCCCTCATCGACGTGAGA     | 3422-3441                     | 60.04                | 55.0       | Sequencing         |
| <b>MF7</b>     | AAATGCCACCAGAGAGGACG     | 3957-3976                     | 60.04                | 55.0       | Sequencing         |
| <b>MR7</b>     | CCTGGGCCTGTACAAAGGAG     | 4327-4308                     | 60.04                | 60.0       | PCR & Sequencing   |
| <b>MF1-MR5</b> |                          |                               | <b>2,770 bp</b>      |            |                    |
| <b>MF4-MR7</b> |                          |                               | <b>2,284 bp</b>      |            |                    |

**Supplementary Table S2.** Distribution of Pvmdr1 haplotypes by countries.

| Haplotype    | Countries* |         |          |        |     |     |     |     |     |     |     |     |     |     |     |     | Total | % isolate/<br>Hap |
|--------------|------------|---------|----------|--------|-----|-----|-----|-----|-----|-----|-----|-----|-----|-----|-----|-----|-------|-------------------|
|              | THA_Tak    | THA_Kan | THA_Ubon | THA_DB | MEX | COL | PER | BRA | MAU | MDG | IND | NKR | CHN | PNG | VIE | ESA |       |                   |
| Hap_1        | 2          | 2       | 1        |        |     | 2   | 25  | 5   |     |     |     |     |     |     |     |     | 37    | 18.41             |
| Hap_2        | 10         | 8       | 5        |        |     |     |     |     |     |     |     |     |     |     |     |     | 23    | 11.44             |
| Hap_3        |            |         |          |        |     | 18  | 2   |     |     |     |     |     |     |     |     |     | 20    | 9.95              |
| Hap_4        | 1          | 9       | 5        |        | 1   |     | 1   |     |     |     |     |     |     |     |     |     | 17    | 8.46              |
| Hap_5        |            | 3       | 16       |        |     |     |     |     |     |     |     |     |     |     |     |     | 19    | 9.45              |
| Hap_6        |            |         |          |        | 13  | 1   |     |     |     | 1   |     |     |     |     |     |     | 15    | 7.46              |
| Hap_7        | 4          | 1       |          |        |     |     |     |     | 1   | 1   |     |     |     |     |     |     | 7     | 3.48              |
| Hap_8        |            |         |          | 3      |     |     |     |     |     |     | 1   |     | 1   | 4   |     |     | 9     | 4.48              |
| Hap_9        |            |         |          | 1      |     |     |     |     |     | 1   |     |     |     | 3   | 1   |     | 6     | 2.99              |
| Hap_10       |            | 5       |          |        |     |     |     |     |     |     |     |     |     |     |     |     | 5     | 2.49              |
| Hap_11       | 1          | 4       |          |        |     |     |     |     |     |     |     |     |     |     |     |     | 5     | 2.49              |
| Hap_12       |            |         |          | 1      |     |     |     |     |     |     |     |     | 3   |     |     |     | 4     | 1.99              |
| Hap_13       |            |         |          |        |     |     |     |     |     | 4   |     |     |     |     |     |     | 4     | 1.99              |
| Hap_14       |            |         |          | 2      |     |     |     |     |     |     |     |     | 1   |     |     |     | 3     | 1.49              |
| Hap_15       |            |         |          | 2      |     |     |     |     |     |     |     |     | 1   |     |     |     | 3     | 1.49              |
| Hap_16       |            |         |          |        | 1   | 1   |     |     |     |     |     |     |     |     |     | 1   | 3     | 1.49              |
| Hap_17       | 1          | 2       |          |        |     |     |     |     |     |     |     |     |     |     |     |     | 3     | 1.49              |
| Hap_18       | 2          |         |          |        |     |     |     |     |     | 1   |     |     |     |     |     |     | 3     | 1.49              |
| Hap_19       |            |         |          | 2      |     |     |     |     |     |     |     |     |     |     |     |     | 2     | 1.00              |
| Hap_20       | 1          | 1       |          |        |     |     |     |     |     |     |     |     |     |     |     |     | 2     | 1.00              |
| Hap_21       |            | 1       | 1        |        |     |     |     |     |     |     |     |     |     |     |     |     | 2     | 1.00              |
| Hap_22       |            |         |          |        |     |     |     |     |     |     |     |     | 1   |     |     |     | 1     | 0.50              |
| Hap_23       |            |         |          |        |     | 1   |     |     |     |     |     |     |     |     |     |     | 1     | 0.50              |
| Hap_24       |            |         |          |        |     |     |     |     |     | 1   |     |     |     |     |     |     | 1     | 0.50              |
| Hap_25       |            |         |          |        |     |     |     |     |     |     |     | 1   |     |     |     |     | 1     | 0.50              |
| Hap_26       |            |         |          |        |     |     | 1   |     |     |     |     |     |     |     |     |     | 1     | 0.50              |
| Hap_27       |            |         |          | 1      |     |     |     |     |     |     |     |     |     |     |     |     | 1     | 0.50              |
| Hap_28       |            |         |          | 1      |     |     |     |     |     |     |     |     |     |     |     |     | 1     | 0.50              |
| Hap_29       |            | 1       |          |        |     |     |     |     |     |     |     |     |     |     |     |     | 1     | 0.50              |
| Hap_30       |            |         | 1        |        |     |     |     |     |     |     |     |     |     |     |     |     | 1     | 0.50              |
| No. isolates | 22         | 37      | 29       | 13     | 15  | 22  | 30  | 5   | 1   | 8   | 2   | 1   | 7   | 7   | 1   | 1   | 201   | 100.00            |

\*Country codes – THA\_Tak: Tak province of Thailand, THA\_Kan: Kanchanaburi province of Thailand, THA\_Ubon: Ubon Ratchathani province of Thailand, THA\_DB: Thai isolates from Plasmodb, MEX: Mexico, COL: Colombia, PER: Peru, BRA: Brazil, MAU: Mauritania, MDG: Madagascar, IND: India, NKR: North Korea, CHN: China, PNG: Papua New Guinea, VIE: Vietnam, and ESA: El Salvador.

**Supplementary Table S3.** Domain-specific polymorphisms and summary statistics of neutrality tests in the near-complete *Pvmdr1* gene in 88Thai isolates.

| Domain       | Region (Start-end) | Length (bp) | Polymorphic site | Haplotypes |                                       | $\pi$          | Departure of Neutrality |                      |                      |
|--------------|--------------------|-------------|------------------|------------|---------------------------------------|----------------|-------------------------|----------------------|----------------------|
|              |                    |             |                  | No. Hap    | Hd $\pm$ VarHd                        |                | Tajima's D              | Fu & Li's D'         | Fu & Li's F'         |
| TM1          | 1-270              | 270         | 0                | 1          | 0                                     | 0              | n.d.                    | n.d.                 | n.d.                 |
| TM2          | 273-426            | 154         | 0                | 1          | 0                                     | 0              | n.d.                    | n.d.                 | n.d.                 |
| TM3          | 459-585            | 127         | 3                | 4          | 0.049 $\pm$ 0.00045                   | 0.00074        | -1.4461                 | -2.2394 <sup>#</sup> | -2.3437*             |
| TM4          | 597-729            | 133         | 3                | 4          | 0.198 $\pm$ 0.00124                   | 0.0015         | -0.9738                 | -2.2394 <sup>#</sup> | -2.1619 <sup>#</sup> |
| TM5          | 762-924            | 163         | 1                | 2          | 0.01 $\pm$ 0.0001                     | 0.0001         | -0.9516                 | -2.202 <sup>#</sup>  | -2.1332 <sup>#</sup> |
| TM6          | 963-1086           | 124         | 1                | 2          | 0.01 $\pm$ 0.0001                     | 0.00008        | -0.9516                 | -2.202 <sup>#</sup>  | -2.1332 <sup>#</sup> |
| NBD1         | 1089-2367          | 1279        | 14               | 13         | 0.455 $\pm$ 0.00159                   | 0.00055        | -1.8732*                | -3.5732**            | -3.516**             |
| TM7          | 2370-2562          | 193         | 3                | 4          | 0.182 $\pm$ 0.0012                    | 0.00171        | -0.999                  | -2.2394 <sup>#</sup> | -2.1716 <sup>#</sup> |
| TM8          | 2580-2721          | 142         | 0                | 1          | 0                                     | 0              | n.d.                    | n.d.                 | n.d.                 |
| TM9          | 2766-2892          | 127         | 3                | 4          | 0.059 $\pm$ 0.00053                   | 0.00091        | -1.4158                 | -2.2394 <sup>#</sup> | -2.332*              |
| TM10         | 2907-3081          | 175         | 3                | 3          | 0.02 $\pm$ 0.00019                    | 0.00022        | -1.5076                 | -3.7453**            | -3.5691**            |
| TM11         | 3120-3255          | 136         | 2                | 3          | 0.475 $\pm$ 0.00046                   | 0.00307        | 0.5835                  | 0.6364               | 0.7309               |
| TM12         | 3294-3417          | 124         | 2                | 3          | 0.02 $\pm$ 0.00019                    | 0.00017        | -1.2845                 | -3.0857*             | -2.9641*             |
| NBD2         | 3420-4257          | 838         | 9                | 10         | 0.263 $\pm$ 0.00164                   | 0.00039        | -1.8584*                | -3.6864**            | -3.6217**            |
| <b>Whole</b> | <b>1-4257</b>      | <b>4257</b> | <b>46</b>        | <b>53</b>  | <b>0.907 <math>\pm</math> 0.00016</b> | <b>0.00069</b> | <b>-2.1456**</b>        | <b>-6.4032**</b>     | <b>-5.4738**</b>     |

# $p < 0.01$ , \*\* $p < 0.02$  & \* $p < 0.05$ , and n.d. is not detected.
